# Supplementary material
Source: PubMed Central journal article supplement (PMC3175642)
Supplement: NIHMS313654-supplement-1.pdf [file NIHMS313654-supplement-1.pdf]

Supplemental Table 1. miR-21<sup>-/-</sup> affected genes at baseline in the lung

| <b>Entrez Gene ID</b> | <b>Gene Symbol</b> | <b>Gene Description</b>                                           |
|-----------------------|--------------------|-------------------------------------------------------------------|
| 9508                  | Adamts3            | ADAM metallopeptidase with thrombospondin type 1 motif, 3         |
| 23382                 | Ahcy12             | adenosylhomocysteinase-like 2                                     |
| 406                   | Arntl              | aryl hydrocarbon receptor nuclear translocator-like               |
| 79365                 | Bhlhe41            | basic helix-loop-helix family, member e41                         |
| 79616                 | Ccnj1              | cyclin J-like                                                     |
| 30835                 | Cd209              | CD209 molecule                                                    |
| 50856                 | Clec4a             | C-type lectin domain family 4, member A                           |
| 10332                 | Clec4m             | C-type lectin domain family 4, member M                           |
| 1271                  | Cntfr              | ciliary neurotrophic factor receptor                              |
| 1271                  | Cntfr              | ciliary neurotrophic factor receptor                              |
| 404093                | Cuedc1             | CUE domain containing 1                                           |
| 10563                 | Cxcl13             | chemokine (C-X-C motif) ligand 13                                 |
| 1628                  | Dbp                | D site of albumin promoter (albumin D-box) binding protein        |
| 8526                  | Dgke               | diacylglycerol kinase, epsilon 64kDa                              |
| 79665                 | Dhx40              | DEAH (Asp-Glu-Ala-His) box polypeptide 40                         |
| 79132                 | Dhx58              | DEXH (Asp-Glu-X-His) box polypeptide 58                           |
| 25975                 | Egfl6              | EGF-like-domain, multiple 6                                       |
| 2006                  | Eln                | elastin                                                           |
| 2155                  | F7                 | coagulation factor VII (serum prothrombin conversion accelerator) |
| 162517                | Fbxo39             | F-box protein 39                                                  |
| 2813                  | Gp2                | glycoprotein 2 (zymogen granule membrane)                         |
| 353345                | Gpr141             | G protein-coupled receptor 141                                    |
| 3665                  | Irf7               | interferon regulatory factor 7                                    |
| 730249                | Irg1               | immunoresponsive 1 homolog (mouse)                                |
| 338785                | Krt79              | keratin 79                                                        |
| 4069                  | Lyz                | lysozyme                                                          |
| 79148                 | Mmp28              | matrix metallopeptidase 28                                        |
| 22861                 | Nlrp1              | NLR family, pyrin domain containing 1                             |
| 9111                  | Nmi                | N-myc (and STAT) interactor                                       |
| 4862                  | Npas2              | neuronal PAS domain protein 2                                     |

|        |         |                                                                                                  |
|--------|---------|--------------------------------------------------------------------------------------------------|
| 9572   | Nr1d1   | nuclear receptor subfamily 1, group D, member 1                                                  |
| 9975   | Nr1d2   | nuclear receptor subfamily 1, group D, member 2                                                  |
| 4938   | Oas1    | 2',5'-oligoadenylate synthetase 1, 40/46kDa                                                      |
| 58488  | Pctp    | phosphatidylcholine transfer protein                                                             |
| 8863   | Per3    | period homolog 3 (Drosophila)                                                                    |
| 5999   | Rgs4    | regulator of G-protein signaling 4                                                               |
| 5999   | Rgs4    | regulator of G-protein signaling 4                                                               |
| 26001  | Rnf167  | ring finger protein 167                                                                          |
| 26001  | Rnf167  | ring finger protein 167                                                                          |
| 57674  | Rnf213  | ring finger protein 213                                                                          |
| 6443   | Sgcb    | sarcoglycan, beta (43kDa dystrophin-associated glycoprotein)                                     |
| 146857 | Slfn13  | schlafen family member 13                                                                        |
| 10417  | Spon2   | spondin 2, extracellular matrix protein                                                          |
| 6879   | Taf7    | TAF7 RNA polymerase II, TATA box binding protein (TBP)-associated factor, 55kDa                  |
| 7045   | Tgfbi   | transforming growth factor, beta-induced, 68kDa                                                  |
| 7051   | Tgm1    | transglutaminase 1 (K polypeptide epidermal type I, protein-glutamine-gamma-glutamyltransferase) |
| 55273  | Tmem100 | transmembrane protein 100                                                                        |
| 7405   | Uvrag   | UV radiation resistance associated gene                                                          |
| 55350  | Vnn3    | vanin 3                                                                                          |

Supplemental Table 2. miR-21<sup>-/-</sup> affected genes after OVA challenge in the Lung

| Probe ID | Gene Symbol                  | Description                                                                              | Regulation      |
|----------|------------------------------|------------------------------------------------------------------------------------------|-----------------|
| 10361292 | Crry                         | complement receptor related protein:Genscan chromosome:NCBIM37:1:19 6861976:196997364:-1 | Hyper-activated |
| 10376887 | C17orf45, SNORD49A, SNORD49B | Mus musculus clone MBII-243 C/D box snoRNA, partial sequence.                            | Hyper-activated |
| 10368616 | 2700019D07Rik                | RIKEN cDNA 2700019D07 gene                                                               | Hyper-activated |
| 10595638 | 4930579C12Rik                | RIKEN cDNA 4930579C12 gene                                                               | Hyper-activated |
| 10587665 | 4930579C12Rik                | RIKEN cDNA 4930579C12 gene                                                               | Hyper-activated |
| 10367532 | 5830405N20Rik                | cdna:known chromosome:NCBIM37:10:1 29759934:129799693:1 gene:ENSMUSG00000034833          | Hyper-activated |
| 10566333 | 9230105E10Rik                | RIKEN cDNA 9230105E10 gene                                                               | Hyper-activated |
| 10566346 | 9230105E10Rik                | RIKEN cDNA 9230105E10 gene                                                               | Hyper-activated |
| 10387985 | A430084P05Rik                | RIKEN cDNA A430084P05 gene (A430084P05Rik), mRNA                                         | Hyper-activated |
| 10531195 | Adamts3                      | ADAM metallopeptidase with thrombospondin type 1 motif, 3                                | Hyper-activated |
| 10531177 | Adamts3                      | ADAM metallopeptidase with thrombospondin type 1 motif, 3                                | Hyper-activated |
| 10531191 | Adamts3                      | ADAM metallopeptidase with thrombospondin type 1 motif, 3                                | Hyper-activated |
| 10566366 | AI451617                     | expressed sequence AI451617                                                              | Hyper-activated |
| 10450484 | Aif1                         | allograft inflammatory factor 1                                                          | Hyper-activated |
| 10403871 | Aoah                         | acyloxyacyl hydrolase                                                                    | Hyper-activated |
| 10439009 | Apod                         | apolipoprotein D                                                                         | Hyper-activated |

|          |          |                                                        |                 |
|----------|----------|--------------------------------------------------------|-----------------|
| 10471154 | Ass1     | argininosuccinate synthetase 1                         | Hyper-activated |
| 10502335 | Bank1    | B-cell scaffold protein with ankyrin repeats 1         | Hyper-activated |
| 10571984 | BC013672 | cDNA sequence BC013672                                 | Hyper-activated |
| 10531980 | BC057170 | cDNA sequence BC057170                                 | Hyper-activated |
| 10360370 | BC094916 | cDNA sequence BC094916                                 | Hyper-activated |
| 10541683 | C1r      | complement component 1, r subcomponent (C1r), mRNA     | Hyper-activated |
| 10547740 | C1s      | complement component 1, s subcomponent                 | Hyper-activated |
| 10450344 | C2       | complement component 2 (within H-2S)                   | Hyper-activated |
| 10582997 | Casp4    | caspase 4, apoptosis-related cysteine peptidase        | Hyper-activated |
| 10389064 | Ccl1     | chemokine (C-C motif) ligand 1                         | Hyper-activated |
| 10512372 | Ccl19    | chemokine (C-C motif) ligand 19                        | Hyper-activated |
| 10504159 | Ccl19    | chemokine (C-C motif) ligand 19                        | Hyper-activated |
| 10512322 | Ccl19    | chemokine (C-C motif) ligand 19                        | Hyper-activated |
| 10504188 | Ccl19    | chemokine (C-C motif) ligand 19                        | Hyper-activated |
| 10504132 | Ccl19    | chemokine (C-C motif) ligand 19                        | Hyper-activated |
| 10389231 | Ccl3     | chemokine (C-C motif) ligand 3                         | Hyper-activated |
| 10406928 | Cd180    | CD180 antigen                                          | Hyper-activated |
| 10567863 | Cd19     | CD19 antigen                                           | Hyper-activated |
| 10457168 | Cd226    | CD226 antigen                                          | Hyper-activated |
| 10462390 | Cd274    | CD274 antigen (Cd274), mRNA                            | Hyper-activated |
| 10450957 | Cenpq    | centromere protein Q                                   | Hyper-activated |
| 10387699 | Centb1   | centaurin, beta 1                                      | Hyper-activated |
| 10450325 | Cfb      | complement factor B                                    | Hyper-activated |
| 10541614 | Clec4d   | C-type lectin domain family 4, member d (Clec4d), mRNA | Hyper-activated |
| 10547664 | Clec4e   | C-type lectin domain family 4, member e (Clec4e), mRNA | Hyper-activated |

|          |            |                                                                                   |                 |
|----------|------------|-----------------------------------------------------------------------------------|-----------------|
| 10544273 | Clec5a     | C-type lectin domain family 5, member a                                           | Hyper-activated |
| 10508074 | Csf3r      | colony stimulating factor 3 receptor (granulocyte) (Csf3r), mRNA                  | Hyper-activated |
| 10582868 | Csprs      | cdna:known<br>chromosome:NCBIM37:1:85273786:85286414:1<br>gene:ENSMUSG00000079455 | Hyper-activated |
| 10356271 | Csprs      | cdna:Genscan<br>chromosome:NCBIM37:1:85024529:85115049:-1                         | Hyper-activated |
| 10347928 | Csprs      | cdna:known<br>chromosome:NCBIM37:1:85271682:85273595:1<br>gene:ENSMUSG00000079458 | Hyper-activated |
| 10582874 | Csprs      | cdna:known<br>chromosome:NCBIM37:1:85271682:85273595:1<br>gene:ENSMUSG00000079458 | Hyper-activated |
| 10534909 | Csprs      | cdna:known<br>chromosome:NCBIM37:1:85273786:85286414:1<br>gene:ENSMUSG00000079455 | Hyper-activated |
| 10465059 | Ctsw       | cathepsin W (Ctsw), mRNA                                                          | Hyper-activated |
| 10531415 | Cxcl10     | chemokine (C-X-C motif) ligand 10                                                 | Hyper-activated |
| 10523156 | Cxcl2      | chemokine (C-X-C motif) ligand 2                                                  | Hyper-activated |
| 10531407 | Cxcl9      | chemokine (C-X-C motif) ligand 9                                                  | Hyper-activated |
| 10420488 | D14Ert668e | DNA segment, Chr 14, ERATO Doi 668, expressed                                     | Hyper-activated |
| 10391207 | Dhx58      | DEXH (Asp-Glu-X-His) box polypeptide 58                                           | Hyper-activated |
| 10417526 | Dnase1l3   | deoxyribonuclease 1-like 3                                                        | Hyper-activated |
| 10466127 | EF660528   | small secreted protein interferon-induced mRNA, expressed sequence AW112010       | Hyper-activated |

|          |                    |                                                                                      |                 |
|----------|--------------------|--------------------------------------------------------------------------------------|-----------------|
| 10566580 | EG209380           | predicted gene, EG209380                                                             | Hyper-activated |
| 10455954 | EG240327           | predicted gene, EG240327                                                             | Hyper-activated |
| 10360367 | EG240921           | predicted gene, EG240921                                                             | Hyper-activated |
| 10363541 | EG432466           | predicted gene, EG432466                                                             | Hyper-activated |
| 10466314 | EG625046           | predicted gene, EG625046                                                             | Hyper-activated |
| 10566583 | EG668139           | predicted gene, EG668139                                                             | Hyper-activated |
| 10397083 | ENSMUSG0000010608  | cdna:known<br>chromosome:NCBIM37:12:84983579:85024073:1<br>gene:ENSMUSG00000010608   | Hyper-activated |
| 10538590 | ENSMUSG00000029798 | cdna:known<br>chromosome:NCBIM37:6:57531031:57613290:1<br>gene:ENSMUSG00000029798    | Hyper-activated |
| 10542911 | ENSMUSG00000047735 | cdna:known<br>chromosome:NCBIM37:6:3322260:3349492:-1<br>gene:ENSMUSG00000047735     | Hyper-activated |
| 10360373 | ENSMUSG00000073491 | cdna:known<br>chromosome:NCBIM37:1:175522093:175529405:-1<br>gene:ENSMUSG00000073491 | Hyper-activated |
| 10566578 | ENSMUSG00000073904 | cdna:known<br>chromosome:NCBIM37:7:113220264:113222657:-1<br>gene:ENSMUSG00000073904 | Hyper-activated |
| 10416566 | Epsti1             | epithelial stromal interaction 1 (breast)                                            | Hyper-activated |
| 10378068 | Fbxo39             | F-box protein 39 (Fbxo39), mRNA                                                      | Hyper-activated |
| 10500335 | Fcgr1              | Fc receptor, IgG, high affinity I                                                    | Hyper-activated |
| 10351509 | Fcgr4              | Fc receptor, IgG, low affinity IV (Fcgr4), mRNA                                      | Hyper-activated |
| 10519983 | Fgl2               | fibrinogen-like protein 2                                                            | Hyper-activated |
| 10422760 | Fyb                | FYN binding protein                                                                  | Hyper-activated |
| 10351037 | Gas5               | growth arrest specific 5                                                             | Hyper-activated |

|          |               |                                                                  |                 |
|----------|---------------|------------------------------------------------------------------|-----------------|
| 10351043 | Gas5, Snord47 | Mus musculus clone MBII-96 C/D box snoRNA, partial sequence.     | Hyper-activated |
| 10496592 | Gbp2          | guanylate nucleotide binding protein 2                           | Hyper-activated |
| 10496580 | Gbp3          | guanylate nucleotide binding protein 3                           | Hyper-activated |
| 10496539 | Gbp5          | guanylate nucleotide binding protein 5 (Gbp5), mRNA              | Hyper-activated |
| 10531972 | Gbp6          | Guanylate-binding protein 6, RIKEN cDNA 5830443L24 gene          | Hyper-activated |
| 10531987 | Gbp6          | Guanylate-binding protein 6, RIKEN cDNA 5830443L24 gene          | Hyper-activated |
| 10496569 | Gbp6          | guanylate binding protein 6                                      | Hyper-activated |
| 10385504 | Gm5431        | novel interferon-inducible GTPase (IIGP) family member, EG432555 | Hyper-activated |
| 10533720 | Gpr109a       | G protein-coupled receptor 109A                                  | Hyper-activated |
| 10601424 | Gpr174        | G protein-coupled receptor 174                                   | Hyper-activated |
| 10420308 | Gzmb          | granzyme B                                                       | Hyper-activated |
| 10364361 | Icosl         | icos ligand                                                      | Hyper-activated |
| 10360391 | Ifi203        | interferon activated gene 203                                    | Hyper-activated |
| 10360382 | Ifi204        | interferon activated gene 204                                    | Hyper-activated |
| 10360406 | Ifi205        | interferon activated gene 205                                    | Hyper-activated |
| 10375515 | Ifi47         | interferon gamma inducible protein 47                            | Hyper-activated |
| 10462613 | Ifit2         | interferon-induced protein with tetratricopeptide repeats 2      | Hyper-activated |
| 10462618 | Ifit3         | interferon-induced protein with tetratricopeptide repeats 3      | Hyper-activated |
| 10570434 | Ifitm1        | interferon induced transmembrane protein 1                       | Hyper-activated |
| 10376326 | Igtp          | interferon gamma induced GTPase                                  | Hyper-activated |
| 10455961 | Iigp1         | interferon inducible GTPase 1                                    | Hyper-activated |
| 10545135 | Il12rb2       | interleukin 12 receptor, beta 2                                  | Hyper-activated |

|          |              |                                                                                                                                              |                 |
|----------|--------------|----------------------------------------------------------------------------------------------------------------------------------------------|-----------------|
| 10545154 | Il23r        | interleukin 23 receptor                                                                                                                      | Hyper-activated |
| 10574427 | Impdh2       | inosine 5'-phosphate dehydrogenase 2                                                                                                         | Hyper-activated |
| 10577655 | Indo         | indoleamine-pyrrole 2,3 dioxygenase                                                                                                          | Hyper-activated |
| 10376060 | Irf1         | interferon regulatory factor 1                                                                                                               | Hyper-activated |
| 10376324 | Irgb10       | interferon-gamma-inducible p47 GTPase                                                                                                        | Hyper-activated |
| 10385500 | Irgm         | immunity-related GTPase family, M                                                                                                            | Hyper-activated |
| 10385428 | Itk          | IL2-inducible T-cell kinase                                                                                                                  | Hyper-activated |
| 10542140 | Klrb1f       | killer cell lectin-like receptor subfamily B member 1F (Klrb1f), mRNA; killer cell lectin-like receptor subfamily B member 1F (Klrb1f), mRNA | Hyper-activated |
| 10548345 | Klrk1        | killer cell lectin-like receptor subfamily K, member 1                                                                                       | Hyper-activated |
| 10450675 | LOC100045444 | similar to histocompatibility 2, T region locus 24                                                                                           | Hyper-activated |
| 10455957 | LOC546714    | hypothetical LOC546714                                                                                                                       | Hyper-activated |
| 10385507 | LOC620913    | Ras_like_GTPase:NCBIM37:11:48720659:48729864:-1                                                                                              | Hyper-activated |
| 10598152 | LOC625360    | similar to 2-cell-stage, variable group, member 3                                                                                            | Hyper-activated |
| 10367744 | LOC629446    | gag protein                                                                                                                                  | Hyper-activated |
| 10462621 | LOC667370    | similar to interferon-induced protein with tetratricopeptide repeats 3                                                                       | Hyper-activated |
| 10455970 | LOC667597    | hypothetical LOC667597                                                                                                                       | Hyper-activated |
| 10444752 | Ltb          | lymphotoxin B                                                                                                                                | Hyper-activated |
| 10429520 | Ly6d         | lymphocyte antigen 6 complex, locus D                                                                                                        | Hyper-activated |
| 10429560 | Ly6i         | lymphocyte antigen 6 complex, locus I (Ly6i), mRNA                                                                                           | Hyper-activated |
| 10421555 | Mir687       | ncrna:miRNA chromosome:NCBIM37:14:73606570:73606658:-1 gene:ENSMUSG00000076121                                                               | Hyper-activated |

|          |        |                                                                                                               |                 |
|----------|--------|---------------------------------------------------------------------------------------------------------------|-----------------|
| 10531994 | Mpa2l  | cdna:known-ccds<br>chromosome:NCBIM37:5:10<br>5702121:105722714:-1<br>gene:ENSMUSG000000793<br>62 CCDS19492.1 | Hyper-activated |
| 10532019 | Mpa2l  | macrophage activation 2 like                                                                                  | Hyper-activated |
| 10355456 | Mreg   | melanoregulin                                                                                                 | Hyper-activated |
| 10461605 | Ms4a4b | membrane-spanning 4-<br>domains, subfamily A,<br>member 4B                                                    | Hyper-activated |
| 10545672 | Mthfd2 | methylenetetrahydrofolate<br>dehydrogenase (NAD+<br>dependent),<br>methenyltetrahydrofolate<br>cyclohydrolase | Hyper-activated |
| 10353010 | Mybl1  | myeloblastosis oncogene-<br>like 1                                                                            | Hyper-activated |
| 10552406 | Nkg7   | natural killer cell group 7<br>sequence (Nkg7), mRNA                                                          | Hyper-activated |
| 10574104 | Nlrc5  | NLR family, CARD domain<br>containing 5                                                                       | Hyper-activated |
| 10574163 | Nlrc5  | NLR family, CARD domain<br>containing 5 (Nlrc5), mRNA                                                         | Hyper-activated |
| 10376513 | Nlrp3  | NLR family, pyrin domain<br>containing 3                                                                      | Hyper-activated |
| 10525158 | Oas1b  | cdna:Genscan<br>chromosome:NCBIM37:5:12<br>1262710:121301677:1                                                | Hyper-activated |
| 10533198 | Oas2   | 2'-5' oligoadenylate<br>synthetase 2 (Oas2), mRNA                                                             | Hyper-activated |
| 10533213 | Oas3   | 2'-5' oligoadenylate<br>synthetase 3                                                                          | Hyper-activated |
| 10505438 | Orm1   | orosomuroid 1                                                                                                 | Hyper-activated |
| 10498367 | P2ry13 | purinergic receptor P2Y, G-<br>protein coupled 13                                                             | Hyper-activated |
| 10439249 | Parp14 | poly (ADP-ribose)<br>polymerase family, member<br>14 (Parp14), mRNA                                           | Hyper-activated |
| 10420483 | Phf11  | PHD finger protein 11                                                                                         | Hyper-activated |
| 10534935 | Pilrb1 | paired immunoglobulin-like<br>type 2 receptor beta 1                                                          | Hyper-activated |
| 10531724 | Plac8  | placenta-specific 8                                                                                           | Hyper-activated |
| 10385511 | Psme2  | proteasome (prosome,<br>macropain) 28 subunit, beta                                                           | Hyper-activated |

|          |         |                                                                                      |                 |
|----------|---------|--------------------------------------------------------------------------------------|-----------------|
| 10545101 | Ptgds2  | prostaglandin D2 synthase 2, hematopoietic                                           | Hyper-activated |
| 10351873 | Pyhin1  | pyrin and HIN domain family, member 1                                                | Hyper-activated |
| 10383200 | Rnf213  | ring finger protein 213 (Rnf213), mRNA                                               | Hyper-activated |
| 10444814 | Rnf213  | cdna:known<br>chromosome:NCBIM37:17:35516576:35520721:1<br>gene:ENSMUSG00000035929   | Hyper-activated |
| 10383192 | Rnf213  | ring finger protein 213 (Rnf213), mRNA                                               | Hyper-activated |
| 10383210 | Rnf213  | ring finger protein 213 (Rnf213), mRNA                                               | Hyper-activated |
| 10383206 | Rnf213  | ring finger protein 213 (Rnf213), mRNA                                               | Hyper-activated |
| 10383212 | Rnf213  | ring finger protein 213 (Rnf213), mRNA                                               | Hyper-activated |
| 10383208 | Rnf213  | ring finger protein 213 (Rnf213), mRNA                                               | Hyper-activated |
| 10563108 | Rnu35a  | RNA, U35a small nucleolar                                                            | Hyper-activated |
| 10499130 | Rnu73b  | ncrna:snoRNA<br>chromosome:NCBIM37:3:85944540:85944610:-1<br>gene:ENSMUSG00000064390 | Hyper-activated |
| 10434778 | Rtp4    | receptor transporter protein 4 (Rtp4), mRNA                                          | Hyper-activated |
| 10563597 | Saa3    | serum amyloid A 3                                                                    | Hyper-activated |
| 10420503 | Setdb2  | SET domain, bifurcated 2                                                             | Hyper-activated |
| 10487823 | Siglec1 | sialic acid binding Ig-like lectin 1, sialoadhesin                                   | Hyper-activated |
| 10497356 | Sirpb1  | signal-regulatory protein beta 1                                                     | Hyper-activated |
| 10351667 | Slamf1  | signaling lymphocytic activation molecule family member 1                            | Hyper-activated |
| 10379633 | Slfn1   | schlafen 1                                                                           | Hyper-activated |
| 10389151 | Slfn10  | schlafen 10                                                                          | Hyper-activated |
| 10379630 | Slfn2   | schlafen 2                                                                           | Hyper-activated |
| 10379646 | Slfn3   | schlafen 3                                                                           | Hyper-activated |
| 10389134 | Slfn9   | schlafen 9                                                                           | Hyper-activated |

|          |               |                                                                                               |                 |
|----------|---------------|-----------------------------------------------------------------------------------------------|-----------------|
| 10489463 | Slpi          | secretory leukocyte peptidase inhibitor (Slpi), mRNA                                          | Hyper-activated |
| 10461156 | Snhg1         | small nucleolar RNA host gene (non-protein coding) 1                                          | Hyper-activated |
| 10461152 | Snhg1         | small nucleolar RNA host gene (non-protein coding) 1                                          | Hyper-activated |
| 10563112 | Snord33       | small nucleolar RNA, C/D box 33                                                               | Hyper-activated |
| 10347948 | Sp100         | nuclear antigen Sp100                                                                         | Hyper-activated |
| 10356278 | Sp110         | Sp110 nuclear body protein                                                                    | Hyper-activated |
| 10582862 | Sp140         | Sp140 nuclear body protein                                                                    | Hyper-activated |
| 10347933 | Sp140         | Sp140 nuclear body protein                                                                    | Hyper-activated |
| 10346191 | Stat1         | signal transducer and activator of transcription 1                                            | Hyper-activated |
| 10367224 | Stat2         | signal transducer and activator of transcription 2                                            | Hyper-activated |
| 10519497 | Steap4        | STEAP family member 4                                                                         | Hyper-activated |
| 10444244 | Tap1          | transporter 1, ATP-binding cassette, sub-family B (MDR/TAP) (Tap1), mRNA                      | Hyper-activated |
| 10390328 | Tbx21         | T-box 21 (Tbx21), mRNA                                                                        | Hyper-activated |
| 10405587 | Tgfbi         | transforming growth factor, beta induced                                                      | Hyper-activated |
| 10385518 | Tgtp          | T-cell specific GTPase                                                                        | Hyper-activated |
| 10385533 | Tgtp          | T-cell specific GTPase                                                                        | Hyper-activated |
| 10530145 | Tlr1          | toll-like receptor 1                                                                          | Hyper-activated |
| 10450501 | Tnf           | tumor necrosis factor                                                                         | Hyper-activated |
| 10398665 | Tnfaip2       | tumor necrosis factor, alpha-induced protein 2                                                | Hyper-activated |
| 10566326 | Trim12        | tripartite motif protein 12                                                                   | Hyper-activated |
| 10566358 | Trim30        | tripartite motif protein 30                                                                   | Hyper-activated |
| 10490150 | Zbp1          | Z-DNA binding protein 1 (Zbp1), mRNA                                                          | Hyper-activated |
| 10489701 | 4833422F24Rik | RIKEN cDNA 4833422F24 gene (4833422F24Rik), mRNA                                              | De-Activated    |
| 10568873 | Adam8         | a disintegrin and metallopeptidase domain 8                                                   | De-Activated    |
| 10546432 | Adamts9       | a disintegrin-like and metallopeptidase (reprolysin type) with thrombospondin type 1 motif, 9 | De-Activated    |

|          |          |                                                                               |              |
|----------|----------|-------------------------------------------------------------------------------|--------------|
| 10536931 | Ahcy12   | S-adenosylhomocysteine hydrolase-like 2 (Ahcyl2), RIKEN cDNA 4631427C17 gene  | De-Activated |
| 10379652 | AI450353 | expressed sequence AI450353                                                   | De-Activated |
| 10387855 | Alox15   | arachidonate 15-lipoxygenase                                                  | De-Activated |
| 10560919 | Atp1a3   | ATPase, Na <sup>+</sup> /K <sup>+</sup> transporting, alpha 3 polypeptide     | De-Activated |
| 10490923 | Car2     | carbonic anhydrase 2                                                          | De-Activated |
| 10574226 | Ccl17    | chemokine (C-C motif) ligand 17                                               | De-Activated |
| 10389214 | Ccl9     | cdna:known chromosome:NCBIM37:11:83388861:83392005:-1 gene:ENSMUSG00000019122 | De-Activated |
| 10498192 | Ccna1    | cyclin A1 (Ccna1), mRNA                                                       | De-Activated |
| 10576784 | Cd209a   | CD209a antigen                                                                | De-Activated |
| 10576799 | Cd209e   | CD209e antigen                                                                | De-Activated |
| 10496001 | Cfi      | complement component factor i                                                 | De-Activated |
| 10501020 | Chi3l3   | chitinase 3-like 3 (Chi3l3), mRNA                                             | De-Activated |
| 10541587 | Clec4a2  | C-type lectin domain family 4, member a2                                      | De-Activated |
| 10370210 | Col6a1   | collagen, type VI, alpha 1                                                    | De-Activated |
| 10530441 | Corin    | corin (Corin), mRNA                                                           | De-Activated |
| 10389561 | Dhx40    | DEAH (Asp-Glu-Ala-His) box polypeptide 40                                     | De-Activated |
| 10419154 | Ear1     | eosinophil-associated, ribonuclease A family, member 1                        | De-Activated |
| 10419156 | Ear10    | eosinophil-associated, ribonuclease A family, member 10                       | De-Activated |
| 10598175 | Ear10    | eosinophil-associated, ribonuclease A family, member 10                       | De-Activated |
| 10419568 | Ear11    | eosinophil-associated, ribonuclease A family, member 11                       | De-Activated |

|          |         |                                                                              |              |
|----------|---------|------------------------------------------------------------------------------|--------------|
| 10414262 | Ear2    | eosinophil-associated, ribonuclease A family, member 2                       | De-Activated |
| 10414551 | Ear5    | eosinophil-associated, ribonuclease A family, member 5                       | De-Activated |
| 10363735 | Egr2    | early growth response 2                                                      | De-Activated |
| 10415857 | Fam167a | cDNA sequence BC065085 (BC065085), mRNA                                      | De-Activated |
| 10410007 | Fbp1    | fructose biphosphatase 1                                                     | De-Activated |
| 10355403 | Fn1     | fibronectin 1                                                                | De-Activated |
| 10547206 | Fxyd4   | FXD domain-containing ion transport regulator 4                              | De-Activated |
| 10567366 | Gp2     | glycoprotein 2 (zymogen granule membrane)                                    | De-Activated |
| 10487238 | Hdc     | histidine decarboxylase                                                      | De-Activated |
| 10574780 | Hsd11b2 | hydroxysteroid 11-beta dehydrogenase 2                                       | De-Activated |
| 10365559 | Igf1    | insulin-like growth factor 1 (Igf1), transcript variant 1, mRNA              | De-Activated |
| 10412126 | Il31ra  | interleukin 31 receptor A                                                    | De-Activated |
| 10377774 | Mgl2    | macrophage galactose N-acetyl-galactosamine specific lectin 2                | De-Activated |
| 10475517 | miR147  | expressed sequence AA467197 (AA467197), mRNA                                 | De-Activated |
| 10583056 | Mmp12   | matrix metalloproteinase 12                                                  | De-Activated |
| 10367400 | Mmp19   | matrix metalloproteinase 19                                                  | De-Activated |
| 10388047 | Nlrp1a  | NLR family, pyrin domain containing 1A                                       | De-Activated |
| 10388065 | Nlrp1b  | NLR family, pyrin domain containing 1B                                       | De-Activated |
| 10388086 | Nlrp1c  | NLR family, pyrin domain containing 1C                                       | De-Activated |
| 10395553 | Nrcam   | neuron-glia-CAM-related cell adhesion molecule                               | De-Activated |
| 10502191 | Ostc    | oligosaccharyltransferase complex subunit (Ostc), RIKEN cDNA 2310008M10 gene | De-Activated |
| 10565962 | P2ry2   | purinergic receptor P2Y, G-protein coupled 2                                 | De-Activated |

|          |         |                                                                                     |              |
|----------|---------|-------------------------------------------------------------------------------------|--------------|
| 10471721 | Ptgs1   | prostaglandin-endoperoxide synthase 1                                               | De-Activated |
| 10436100 | Retnlg  | resistin like gamma                                                                 | De-Activated |
| 10359908 | Rgs4    | regulator of G-protein signaling 4                                                  | De-Activated |
| 10419563 | Rnase1  | ribonuclease, RNase A family, 1 (pancreatic)                                        | De-Activated |
| 10399854 | Slc26a4 | solute carrier family 26, member 4                                                  | De-Activated |
| 10521038 | Slc5a1  | solute carrier family 5 (sodium/glucose cotransporter), member 1                    | De-Activated |
| 10389143 | Slfn8   | schlafen 8                                                                          | De-Activated |
| 10460118 | Socs6   | suppressor of cytokine signaling 6                                                  | De-Activated |
| 10499899 | Sprr1a  | small proline-rich protein 1A                                                       | De-Activated |
| 10493856 | Sprr2a  | hypothetical protein LOC100042514                                                   | De-Activated |
| 10493858 | Sprr2a  | hypothetical protein LOC100042514                                                   | De-Activated |
| 10493850 | Sprr2a  | small proline-rich protein 2A                                                       | De-Activated |
| 10432923 | Spryd3  | SPRY domain containing 3                                                            | De-Activated |
| 10390560 | Stac2   | SH3 and cysteine rich domain 2                                                      | De-Activated |
| 10603843 | Syn1    | synapsin I                                                                          | De-Activated |
| 10420114 | Tgm1    | transglutaminase 1, K polypeptide                                                   | De-Activated |
| 10363762 | Tmem26  | transmembrane protein 26                                                            | De-Activated |
| 10508405 | Tmem54  | transmembrane protein 54                                                            | De-Activated |
| 10513739 | Tnc     | tenascin C                                                                          | De-Activated |
| 10510580 | Tnfrsf9 | tumor necrosis factor receptor superfamily, member 9                                | De-Activated |
| 10388488 | Uvrsg   | cdna:known<br>chromosome:NCBIM37:11:75834762:75841284:-1<br>gene:ENSMUSG00000020846 | De-Activated |
| 10467149 | ---     | cdna:Genscan<br>chromosome:NCBIM37:19:34693304:34694521:-1                          | De-Repressed |
| 10378572 | ---     | cdna:Genscan<br>chromosome:NCBIM37:11:75281707:75326345:1                           | De-Repressed |

|          |                    |                                                                                   |              |
|----------|--------------------|-----------------------------------------------------------------------------------|--------------|
| 10376885 | 2410006H16Rik      | RIKEN cDNA 2410006H16 gene                                                        | De-Repressed |
| 10387723 | 2810408A11Rik      | RIKEN cDNA 2810408A11 gene                                                        | De-Repressed |
| 10602827 | A830080D01Rik      | RIKEN cDNA A830080D01 gene                                                        | De-Repressed |
| 10436304 | Abi3bp             | ABI gene family, member 3 (NESH) binding protein                                  | De-Repressed |
| 10452516 | Ankrd12            | ankyrin repeat domain 12                                                          | De-Repressed |
| 10600901 | Ar                 | androgen receptor                                                                 | De-Repressed |
| 10587534 | Bckdhb             | branched chain ketoacid dehydrogenase E1, beta polypeptide (Bckdhb), mRNA         | De-Repressed |
| 10583008 | Casp12             | caspase 12                                                                        | De-Repressed |
| 10512377 | Ccl21a             | chemokine (C-C motif) ligand 21a                                                  | De-Repressed |
| 10504127 | Ccl21a             | chemokine (C-C motif) ligand 21a                                                  | De-Repressed |
| 10504183 | Ccl21a             | chemokine (C-C motif) ligand 21a                                                  | De-Repressed |
| 10504154 | Ccl21a             | chemokine (C-C motif) ligand 21a                                                  | De-Repressed |
| 10545865 | Cml3               | camello-like 3                                                                    | De-Repressed |
| 10512279 | Cntfr              | ciliary neurotrophic factor receptor (Cntfr), mRNA                                | De-Repressed |
| 10344803 | Cspp1              | centrosome and spindle pole associated protein 1                                  | De-Repressed |
| 10344805 | Cspp1              | centrosome and spindle pole associated protein 1                                  | De-Repressed |
| 10380226 | Cuedc1             | CUE domain containing 1 (Cuedc1), mRNA                                            | De-Repressed |
| 10553092 | Dbp                | D site albumin promoter binding protein (Dbp), mRNA                               | De-Repressed |
| 10365974 | Dcn                | decorin                                                                           | De-Repressed |
| 10565775 | Dgat2              | diacylglycerol O-acyltransferase 2                                                | De-Repressed |
| 10352110 | EG545391           | predicted gene, EG545391 (EG545391), mRNA                                         | De-Repressed |
| 10491627 | ENSMUSG00000037270 | cdna:known<br>chromosome:NCBIM37:3:36852804:36951937:1<br>gene:ENSMUSG00000037270 | De-Repressed |

|          |           |                                                                                      |              |
|----------|-----------|--------------------------------------------------------------------------------------|--------------|
| 10563116 | Flt3l     | FMS-like tyrosine kinase 3 ligand                                                    | De-Repressed |
| 10448124 | Fpr1      | formyl peptide receptor 1                                                            | De-Repressed |
| 10585194 | Il18      | interleukin 18                                                                       | De-Repressed |
| 10469786 | Il1f9     | interleukin 1 family, member 9                                                       | De-Repressed |
| 10416705 | LOC668603 | similar to Rpl17 protein                                                             | De-Repressed |
| 10497345 | LOC751864 | SIRP beta 1 like 2                                                                   | De-Repressed |
| 10589703 | Ltf       | lactotransferrin                                                                     | De-Repressed |
| 10357261 | Marco     | macrophage receptor with collagenous structure                                       | De-Repressed |
| 10496756 | Mcoln3    | mucolipin 3 (Mcoln3), mRNA                                                           | De-Repressed |
| 10497077 | Mir186    | ncrna:miRNA<br>chromosome:NCBIM37:3:157207243:157207313:1<br>gene:ENSMUSG00000065431 | De-Repressed |
| 10604694 | Mtap7d3   | MAP7 domain containing 3                                                             | De-Repressed |
| 10598075 | mt-Ta     | ncrna:Mt_tRNA<br>chromosome:NCBIM37:MT:5018:5086:-1<br>gene:ENSMUSG00000064347       | De-Repressed |
| 10598057 | mt-Tr     | ncrna:Mt_tRNA<br>chromosome:NCBIM37:MT:9808:9875:1<br>gene:ENSMUSG00000064361        | De-Repressed |
| 10417734 | Nr1d2     | nuclear receptor subfamily 1, group D, member 2                                      | De-Repressed |
| 10356601 | Per2      | period homolog 2 (Drosophila)                                                        | De-Repressed |
| 10518781 | Per3      | period homolog 3 (Drosophila)                                                        | De-Repressed |
| 10377927 | Rnf167    | ring finger protein 167                                                              | De-Repressed |
| 10492456 | Rsrc1     | arginine/serine-rich coiled-coil 1                                                   | De-Repressed |
| 10530633 | Sgcb      | sarcoglycan, beta (dystrophin-associated glycoprotein)                               | De-Repressed |
| 10421172 | Slc25a37  | solute carrier family 25, member 37                                                  | De-Repressed |
| 10414612 | Slc39a2   | solute carrier family 39 (zinc transporter), member 2                                | De-Repressed |

|          |               |                                                                                                                                                                                                    |                     |
|----------|---------------|----------------------------------------------------------------------------------------------------------------------------------------------------------------------------------------------------|---------------------|
| 10388782 | Snord42a      | ncrna:snoRNA<br>chromosome:NCBIM37:11:7<br>7994801:77994865:-1<br>gene:ENSMUSG000000645<br>40                                                                                                      | De-Repressed        |
| 10492102 | Spg20         | spastic paraplegia 20,<br>spartin (Troyer syndrome)<br>homolog (human)                                                                                                                             | De-Repressed        |
| 10490078 | Sumo1         | SMT3 suppressor of mif two<br>3 homolog 1 (yeast)                                                                                                                                                  | De-Repressed        |
| 10458424 | Taf7          | TAF7 RNA polymerase II,<br>TATA box binding protein<br>(TBP)-associated factor<br>(Taf7), mRNA; TAF7 RNA<br>polymerase II, TATA box<br>binding protein (TBP)-<br>associated factor (Taf7),<br>mRNA | De-Repressed        |
| 10380285 | Tmem100       | transmembrane protein 100<br>(Tmem100), mRNA                                                                                                                                                       | De-Repressed        |
| 10481949 | Traf1         | Tnf receptor-associated<br>factor 1                                                                                                                                                                | De-Repressed        |
| 10362129 | Vnn3          | vanin 3                                                                                                                                                                                            | De-Repressed        |
| 10355998 | A830043J08Rik | RIKEN cDNA A830043J08<br>gene (A830043J08Rik),<br>mRNA                                                                                                                                             | Hyper-<br>Repressed |
| 10556463 | Arntl         | aryl hydrocarbon receptor<br>nuclear translocator-like                                                                                                                                             | Hyper-<br>Repressed |
| 10375313 | Ccnjl         | cyclin J-like                                                                                                                                                                                      | Hyper-<br>Repressed |
| 10389738 | Dgke          | diacylglycerol kinase, epsilon                                                                                                                                                                     | Hyper-<br>Repressed |
| 10534343 | Eln           | elastin                                                                                                                                                                                            | Hyper-<br>Repressed |
| 10389177 | Mmp28         | matrix metalloproteinase 28<br>(epilysin)                                                                                                                                                          | Hyper-<br>Repressed |
| 10345675 | Npas2         | neuronal PAS domain<br>protein 2                                                                                                                                                                   | Hyper-<br>Repressed |
| 10538247 | Npy           | neuropeptide Y                                                                                                                                                                                     | Hyper-<br>Repressed |
| 10559784 | Olf1347       | olfactory receptor 1347                                                                                                                                                                            | Hyper-<br>Repressed |
| 10389775 | Pctp          | phosphatidylcholine transfer<br>protein                                                                                                                                                            | Hyper-<br>Repressed |

|          |         |                                                                                               |                 |
|----------|---------|-----------------------------------------------------------------------------------------------|-----------------|
| 10439321 | Slc15a2 | solute carrier family 15 (H+/peptide transporter), member 2 (Slc15a2), mRNA                   | Hyper-Repressed |
| 10573956 | Slc6a2  | solute carrier family 6 (neurotransmitter transporter, noradrenalin), member 2 (Slc6a2), mRNA | Hyper-Repressed |
| 10382328 | Sox9    | SRY-box containing gene 9 (Sox9), mRNA                                                        | Hyper-Repressed |
| 10529264 | Spon2   | spondin 2, extracellular matrix protein (Spon2), mRNA                                         | Hyper-Repressed |
| 10387368 | Tmem88  | transmembrane protein 88 (Tmem88), mRNA                                                       | Hyper-Repressed |
| 10388880 | Tmem97  | transmembrane protein 97 (Tmem97), mRNA                                                       | Hyper-Repressed |
| 10544348 | Trpv6   | transient receptor potential cation channel, subfamily V, member 6                            | Hyper-Repressed |

Supplemental Table 3. Network nodes in the IL-12/IFN $\gamma$  pathway as identified in Figure 2B

| Entrez Gene ID | Symbol                    | Description                                                                  |
|----------------|---------------------------|------------------------------------------------------------------------------|
| 226421         | 5430435G22RIK             | RIKEN cDNA 5430435G22 gene                                                   |
| 11629          | AIF1                      | allograft inflammatory factor 1                                              |
| 27052          | AOAH                      | acyloxyacyl hydrolase (neutrophil)                                           |
| 50909          | C1R                       | complement component 1, r subcomponent                                       |
| 239319         | CARD6                     | caspase recruitment domain family, member 6                                  |
| 20290          | CCL1                      | chemokine (C-C motif) ligand 1                                               |
| 100043918      | CCL19                     | chemokine (C-C motif) ligand 19                                              |
| 65956          | CCL21                     | chemokine (C-C motif) ligand 21                                              |
| 20302          | CCL3L3                    | chemokine (C-C motif) ligand 3-like 3                                        |
| 225825         | CD226                     | CD226 molecule                                                               |
| 60533          | CD274                     | CD274 molecule                                                               |
| 12575          | CDKN1A                    | cyclin-dependent kinase inhibitor 1A (p21, Cip1)                             |
| 15945          | CXCL10                    | chemokine (C-X-C motif) ligand 10                                            |
| 20310          | CXCL3                     | chemokine (C-X-C motif) ligand 3                                             |
| 17329          | CXCL9                     | chemokine (C-X-C motif) ligand 9                                             |
| 26417/26413    | ERK1/2                    | mitogen-activated protein kinase 1/3                                         |
| 14131          | Fcgr3                     | Fc receptor, IgG, low affinity III                                           |
| 246256         | FCGR3A                    | Fc fragment of IgG, low affinity IIIa, receptor (CD16a)                      |
| 14190          | FGL2                      | fibrinogen-like 2                                                            |
| 14256          | FLT3LG                    | fms-related tyrosine kinase 3 ligand                                         |
| 14455          | GAS5                      | growth arrest-specific 5 (non-protein coding)                                |
| 14469          | GBP2                      | guanylate binding protein 2, interferon-inducible                            |
| 55932          | GBP4 (includes EG:115361) | guanylate binding protein 4                                                  |
| 17472          | GBP4 (includes EG:17472)  | guanylate binding protein 4                                                  |
| 229898         | GBP5                      | guanylate binding protein 5                                                  |
| 634650         | GBP6                      | guanylate binding protein family, member 6                                   |
| 229900         | GBP7                      | guanylate binding protein 7                                                  |
| 76074          | GBP8                      | guanylate-binding protein 8                                                  |
| 74558          | GVIN1                     | GTPase, very large interferon inducible 1, pseudogene                        |
| 14939          | GZMB                      | granzyme B (granzyme 2, cytotoxic T-lymphocyte-associated serine esterase 1) |

|        |                |                                                                                                   |
|--------|----------------|---------------------------------------------------------------------------------------------------|
| 15464  | HRC            | histidine rich calcium binding protein                                                            |
| 15930  | IDO1           | indoleamine 2,3-dioxygenase 1                                                                     |
| 226695 | IFI16          | interferon, gamma-inducible protein 16                                                            |
| 15950  | IFI203         | interferon activated gene 203                                                                     |
| 15953  | IFI47          | interferon gamma inducible protein 47                                                             |
| 15977  | IFNB1          | interferon, beta 1, fibroblast                                                                    |
| 15978  | IFNG           | interferon, gamma                                                                                 |
| N/A    | Iga            | Immunoglobulin A                                                                                  |
| N/A    | Ige            | Immunoglobulin E                                                                                  |
| N/A    | IgG            | Immunoglobulin G                                                                                  |
| N/A    | Igm            | Immunoglobulin M                                                                                  |
| 60440  | IIGP1          | interferon inducible GTPase 1                                                                     |
| N/A    | IL12 (complex) | Interleukin 12 (complex)                                                                          |
| N/A    | Il12 receptor  | Interleukin 12 receptor                                                                           |
| 16162  | IL12RB2        | interleukin 12 receptor, beta 2                                                                   |
| 16173  | IL18           | interleukin 18 (interferon-gamma-inducing factor)                                                 |
| 215257 | IL1F9          | interleukin 1 family, member 9                                                                    |
| 209590 | IL23R          | interleukin 23 receptor                                                                           |
| 16362  | IRF1           | interferon regulatory factor 1                                                                    |
| 15944  | IRGM           | immunity-related GTPase family, M                                                                 |
| 54396  | IRGM2          | immunity-related GTPase family M member 2                                                         |
| 17167  | MARCO          | macrophage receptor with collagenous structure                                                    |
| 195046 | NLRP1          | NLR family, pyrin domain containing 1                                                             |
| 216799 | NLRP3          | NLR family, pyrin domain containing 3                                                             |
| 246727 | OAS3           | 2'-5'-oligoadenylate synthetase 3, 100kDa                                                         |
| 18405  | ORM1           | orosomucoid 1                                                                                     |
| 18628  | PER3           | period homolog 3 (Drosophila)                                                                     |
| 27218  | SLAMF1         | signaling lymphocytic activation molecule family member 1                                         |
| 67712  | SLC25A37       | solute carrier family 25, member 37                                                               |
| 20568  | SLPI           | secretory leukocyte peptidase inhibitor                                                           |
| 20586  | SMARCA4        | SWI/SNF related, matrix associated, actin dependent regulator of chromatin, subfamily a, member 4 |
| 57765  | TBX21          | T-box 21                                                                                          |
| 21816  | TGM1           | transglutaminase 1 (K polypeptide epidermal type I, protein-glutamine-gamma-glutamyltransferase)  |
| 21822  | TGTP1          | T-cell specific GTPase 1                                                                          |
| N/A    | TH1 Cytokine   | TH1 Cytokine                                                                                      |

|       |       |                                                     |
|-------|-------|-----------------------------------------------------|
| 24086 | TLR2  | toll-like receptor 2                                |
| 76757 | TRDN  | triadin                                             |
| 83433 | TREM2 | triggering receptor expressed on myeloid cells<br>2 |

Supplemental Table 4. Human genes whose expression patterns are highly similar to that of miR-21 host gene

| <b>Entrez Gene ID</b> | <b>Gene Symbol</b> | <b>Description</b>                                                                |
|-----------------------|--------------------|-----------------------------------------------------------------------------------|
| 60                    | ACTB               | actin, beta                                                                       |
| 87                    | ACTN1              | actinin, alpha 1                                                                  |
| 10097                 | ACTR2              | ARP2 actin-related protein 2 homolog (yeast)                                      |
| 10096                 | ACTR3              | ARP3 actin-related protein 3 homolog (yeast)                                      |
| 10096                 | ACTR3              | ARP3 actin-related protein 3 homolog (yeast)                                      |
| 8754                  | ADAM9              | ADAM metallopeptidase domain 9                                                    |
| 196                   | AHR                | aryl hydrocarbon receptor                                                         |
| 240                   | ALOX5              | arachidonate 5-lipoxygenase                                                       |
| 241                   | ALOX5AP            | arachidonate 5-lipoxygenase-activating protein                                    |
| 301                   | ANXA1              | annexin A1                                                                        |
| 302                   | ANXA2              | annexin A2                                                                        |
| 304                   | ANXA2P2            | annexin A2 pseudogene 2                                                           |
| 397                   | ARHGDI3            | Rho GDP dissociation inhibitor (GDI) beta                                         |
| 10095                 | ARPC1B             | actin related protein 2/3 complex, subunit 1B, 41kDa                              |
| 10092                 | ARPC5              | actin related protein 2/3 complex, subunit 5, 16kDa                               |
| 467                   | ATF3               | activating transcription factor 3                                                 |
| 8553                  | BHLHE40            | basic helix-loop-helix family, member e40                                         |
| 151579                | BZW1P2             | basic leucine zipper and W2 domains 1 pseudogene 2                                |
| 84419                 | C15orf48           | chromosome 15 open reading frame 48                                               |
| 84419                 | C15orf48           | chromosome 15 open reading frame 48                                               |
| 714                   | C1QC               | complement component 1, q subcomponent, C chain                                   |
| 715                   | C1R                | complement component 1, r subcomponent                                            |
| 716                   | C1S                | complement component 1, s subcomponent                                            |
| 822                   | CAPG               | capping protein (actin filament), gelsolin-like                                   |
| 834                   | CASP1              | caspase 1, apoptosis-related cysteine peptidase (interleukin 1, beta, convertase) |
| 841                   | CASP8              | caspase 8, apoptosis-related cysteine peptidase                                   |
| 831                   | CAST               | calpastatin                                                                       |
| 6347                  | CCL2               | chemokine (C-C motif) ligand 2                                                    |
| 965                   | CD58               | CD58 molecule                                                                     |
| 942                   | CD86               | CD86 molecule                                                                     |
| 1051                  | CEBPB              | CCAAT/enhancer binding protein (C/EBP), beta                                      |
| 51192                 | CKLF               | chemokine-like factor                                                             |
| 64581                 | CLEC7A             | C-type lectin domain family 7, member A                                           |
| 1192                  | CLIC1              | chloride intracellular channel 1                                                  |
| 51727                 | CMPK1              | cytidine monophosphate (UMP-CMP) kinase 1, cytosolic                              |
| 1290                  | COL5A2             | collagen, type V, alpha 2                                                         |

|        |          |                                                                             |
|--------|----------|-----------------------------------------------------------------------------|
| 1293   | COL6A3   | collagen, type VI, alpha 3                                                  |
| 23603  | CORO1C   | coronin, actin binding protein, 1C                                          |
| 1452   | CSNK1A1  | casein kinase 1, alpha 1                                                    |
| 1490   | CTGF     | connective tissue growth factor                                             |
| 115908 | CTHRC1   | collagen triple helix repeat containing 1                                   |
| 1508   | CTSB     | cathepsin B                                                                 |
| 1520   | CTSS     | cathepsin S                                                                 |
| 2920   | CXCL2    | chemokine (C-X-C motif) ligand 2                                            |
| 1535   | CYBA     | cytochrome b-245, alpha polypeptide                                         |
| 3491   | CYR61    | cysteine-rich, angiogenic inducer, 61                                       |
| 79139  | DERL1    | Der1-like domain family, member 1                                           |
| 1843   | DUSP1    | dual specificity phosphatase 1                                              |
| 1847   | DUSP5    | dual specificity phosphatase 5                                              |
| 30844  | EHD4     | EH-domain containing 4                                                      |
| 1997   | ELF1     | E74-like factor 1 (ets domain transcription factor)                         |
| 22936  | ELL2     | elongation factor, RNA polymerase II, 2                                     |
| 2012   | EMP1     | epithelial membrane protein 1                                               |
| 9780   | FAM38A   | family with sequence similarity 38, member A                                |
| 2207   | FCER1G   | Fc fragment of IgE, high affinity I, receptor for; gamma polypeptide        |
| 2212   | FCGR2A   | Fc fragment of IgG, low affinity IIa, receptor (CD32)                       |
| 9103   | FCGR2C   | Fc fragment of IgG, low affinity IIc, receptor for (CD32) (gene/pseudogene) |
| 11259  | FILIP1L  | filamin A interacting protein 1-like                                        |
| 2335   | FN1      | fibronectin 1                                                               |
| 2353   | FOS      | FBJ murine osteosarcoma viral oncogene homolog                              |
| 2355   | FOSL2    | FOS-like antigen 2                                                          |
| 2357   | FPR1     | formyl peptide receptor 1                                                   |
| 2359   | FPR3     | formyl peptide receptor 3                                                   |
| 2706   | GJB2     | gap junction protein, beta 2, 26kDa                                         |
| 11010  | GLIPR1   | GLI pathogenesis-related 1                                                  |
| 2752   | GLUL     | glutamate-ammonia ligase                                                    |
| 1880   | GPR183   | G protein-coupled receptor 183                                              |
| 9052   | GPRC5A   | G protein-coupled receptor, family C, group 5, member A                     |
| 9555   | H2AFY    | H2A histone family, member Y                                                |
| 3020   | H3F3A    | H3 histone, family 3A                                                       |
| 1839   | HBEGF    | heparin-binding EGF-like growth factor                                      |
| 3113   | HLA-DPA1 | major histocompatibility complex, class II, DP alpha 1                      |
| 3118   | HLA-DQA2 | major histocompatibility complex, class II, DQ alpha 2                      |
| 3122   | HLA-DRA  | major histocompatibility complex, class II, DR alpha                        |
| 3383   | ICAM1    | intercellular adhesion molecule 1                                           |

|        |           |                                                                                              |
|--------|-----------|----------------------------------------------------------------------------------------------|
| 8870   | IER3      | immediate early response 3                                                                   |
| 10437  | IFI30     | interferon, gamma-inducible protein 30                                                       |
| 10581  | IFITM2    | interferon induced transmembrane protein 2 (1-8D)                                            |
| 10410  | IFITM3    | interferon induced transmembrane protein 3 (1-8U)                                            |
| 3459   | IFNGR1    | interferon gamma receptor 1                                                                  |
| 3460   | IFNGR2    | interferon gamma receptor 2 (interferon gamma transducer 1)                                  |
| 3597   | IL13RA1   | interleukin 13 receptor, alpha 1                                                             |
| 9235   | IL32      | interleukin 32                                                                               |
| 3566   | IL4R      | interleukin 4 receptor                                                                       |
| 3624   | INHBA     | inhibin, beta A                                                                              |
| 8826   | IQGAP1    | IQ motif containing GTPase activating protein 1                                              |
| 3688   | ITGB1     | integrin, beta 1 (fibronectin receptor, beta polypeptide, antigen CD29 includes MDF2, MSK12) |
| 3689   | ITGB2     | integrin, beta 2 (complement component 3 receptor 3 and 4 subunit)                           |
| 3725   | JUN       | jun proto-oncogene                                                                           |
| 3726   | JUNB      | jun B proto-oncogene                                                                         |
| 11015  | KDEL3     | KDEL (Lys-Asp-Glu-Leu) endoplasmic reticulum protein retention receptor 3                    |
| 1316   | KLF6      | Kruppel-like factor 6                                                                        |
| 7805   | LAPTM5    | lysosomal protein transmembrane 5                                                            |
| 3956   | LGALS1    | lectin, galactoside-binding, soluble, 1                                                      |
| 3976   | LIF       | leukemia inhibitory factor (cholinergic differentiation factor)                              |
| 4000   | LMNA      | lamin A/C                                                                                    |
| 541471 | LOC541471 | hypothetical LOC541471                                                                       |
| 7940   | LST1      | leukocyte specific transcript 1                                                              |
| 56925  | LXN       | latexin                                                                                      |
| 4069   | LYZ       | lysozyme                                                                                     |
| 23764  | MAFF      | v-maf musculoaponeurotic fibrosarcoma oncogene homolog F (avian)                             |
| 7851   | MALL      | mal, T-cell differentiation protein-like                                                     |
| 1326   | MAP3K8    | mitogen-activated protein kinase kinase kinase 8                                             |
| 4170   | MCL1      | myeloid cell leukemia sequence 1 (BCL2-related)                                              |
| 9645   | MICAL2    | microtubule associated monooxygenase, calponin and LIM domain containing 2                   |
| 406991 | MIR21     | microRNA 21                                                                                  |
| 4327   | MMP19     | matrix metalloproteinase 19                                                                  |
| 9019   | MPZL1     | myelin protein zero-like 1                                                                   |
| 9961   | MVP       | major vault protein                                                                          |

|        |           |                                                                                         |
|--------|-----------|-----------------------------------------------------------------------------------------|
| 4627   | MYH9      | myosin, heavy chain 9, non-muscle                                                       |
| 26509  | MYOF      | myoferlin                                                                               |
| 10135  | NAMPT     | nicotinamide phosphoribosyltransferase                                                  |
| 283131 | NEAT1     | nuclear paraspeckle assembly transcript 1 (non-protein coding)                          |
| 4783   | NFIL3     | nuclear factor, interleukin 3 regulated                                                 |
| 64332  | NFKBIZ    | nuclear factor of kappa light polypeptide gene enhancer in B-cells inhibitor, zeta      |
| 4837   | NNMT      | nicotinamide N-methyltransferase                                                        |
| 7262   | PHLDA2    | pleckstrin homology-like domain, family A, member 2                                     |
| 5328   | PLAU      | plasminogen activator, urokinase                                                        |
| 5329   | PLAUR     | plasminogen activator, urokinase receptor                                               |
| 5359   | PLSCR1    | phospholipid scramblase 1                                                               |
| 10631  | POSTN     | periostin, osteoblast specific factor                                                   |
| 5699   | PSMB10    | proteasome (prosome, macropain) subunit, beta type, 10                                  |
| 7803   | PTP4A1    | protein tyrosine phosphatase type IVA, member 1                                         |
| 29108  | PYCARD    | PYD and CARD domain containing                                                          |
| 5861   | RAB1A     | RAB1A, member RAS oncogene family                                                       |
| 11031  | RAB31     | RAB31, member RAS oncogene family                                                       |
| 5880   | RAC2      | ras-related C3 botulinum toxin substrate 2 (rho family, small GTP binding protein Rac2) |
| 5918   | RARRES1   | retinoic acid receptor responder (tazarotene induced) 1                                 |
| 5996   | RGS1      | regulator of G-protein signaling 1                                                      |
| 388    | RHOB      | ras homolog gene family, member B                                                       |
| 389    | RHOC      | ras homolog gene family, member C                                                       |
| 6039   | RNASE6    | ribonuclease, RNase A family, k6                                                        |
| 284996 | RNF149    | ring finger protein 149                                                                 |
| 57674  | RNF213    | ring finger protein 213                                                                 |
| 6237   | RRAS      | related RAS viral (r-ras) oncogene homolog                                              |
| 861    | RUNX1     | runt-related transcription factor 1                                                     |
| 6281   | S100A10   | S100 calcium binding protein A10                                                        |
| 6282   | S100A11   | S100 calcium binding protein A11                                                        |
| 729659 | S100A11P1 | S100 calcium-binding protein A14 (calgizzarin)                                          |
| 140576 | S100A16   | S100 calcium binding protein A16                                                        |
| 6277   | S100A6    | S100 calcium binding protein A6                                                         |
| 6280   | S100A9    | S100 calcium binding protein A9                                                         |
| 64092  | SAMSN1    | SAM domain, SH3 domain and nuclear localization signals 1                               |
| 6303   | SAT1      | spermidine/spermine N1-acetyltransferase 1                                              |
| 55829  | SELS      | selenoprotein S                                                                         |

|       |               |                                                                                                     |
|-------|---------------|-----------------------------------------------------------------------------------------------------|
| 5054  | SERPINE1      | serpin peptidase inhibitor, clade E (nexin, plasminogen activator inhibitor type 1), member 1       |
| 871   | SERPINH1      | serpin peptidase inhibitor, clade H (heat shock protein 47), member 1, (collagen binding protein 1) |
| 6446  | SGK1          | serum/glucocorticoid regulated kinase 1                                                             |
| 83442 | SH3BGR1<br>3  | SH3 domain binding glutamic acid-rich protein like 3                                                |
| 51100 | SH3GLB1       | SH3-domain GRB2-like endophilin B1                                                                  |
| 9021  | SOCS3         | suppressor of cytokine signaling 3                                                                  |
| 6648  | SOD2          | superoxide dismutase 2, mitochondrial                                                               |
| 58472 | SQRDL         | sulfide quinone reductase-like (yeast)                                                              |
| 5552  | SRGN          | serglycin                                                                                           |
| 6774  | STAT3         | signal transducer and activator of transcription 3 (acute-phase response factor)                    |
| 9262  | STK17B        | serine/threonine kinase 17b                                                                         |
| 23213 | SULF1         | sulfatase 1                                                                                         |
| 8407  | TAGLN2        | transgelin 2                                                                                        |
| 6892  | TAPBP         | TAP binding protein (tapasin)                                                                       |
| 30851 | TAX1BP3       | Tax1 (human T-cell leukemia virus type I) binding protein 3                                         |
| 7045  | TGFBI         | transforming growth factor, beta-induced, 68kDa                                                     |
| 7050  | TGIF1         | TGFB-induced factor homeobox 1                                                                      |
| 7052  | TGM2          | transglutaminase 2 (C polypeptide, protein-glutamine-gamma-glutamyltransferase)                     |
| 7057  | THBS1         | thrombospondin 1                                                                                    |
| 7076  | TIMP1         | TIMP metalloproteinase inhibitor 1                                                                  |
| 4071  | TM4SF1        | transmembrane 4 L six family member 1                                                               |
| 56889 | TM9SF3        | transmembrane 9 superfamily member 3                                                                |
| 54499 | TMCO1         | transmembrane and coiled-coil domains 1                                                             |
| 23585 | TMEM50A       | transmembrane protein 50A                                                                           |
| 7128  | TNFAIP3       | tumor necrosis factor, alpha-induced protein 3                                                      |
| 51330 | TNFRSF12<br>A | tumor necrosis factor receptor superfamily, member 12A                                              |
| 7132  | TNFRSF1<br>A  | tumor necrosis factor receptor superfamily, member 1A                                               |
| 7168  | TPM1          | tropomyosin 1 (alpha)                                                                               |
| 7171  | TPM4          | tropomyosin 4                                                                                       |
| 23471 | TRAM1         | translocation associated membrane protein 1                                                         |
| 7204  | TRIO          | triple functional domain (PTPRF interacting)                                                        |
| 8673  | VAMP8         | vesicle-associated membrane protein 8 (endobrevin)                                                  |
| 1462  | VCAN          | versican                                                                                            |
| 7533  | YWHAH         | tyrosine 3-monooxygenase/tryptophan 5-                                                              |

|       |         |                                                                                          |
|-------|---------|------------------------------------------------------------------------------------------|
|       |         | monooxygenase activation protein, eta polypeptide                                        |
| 7534  | YWHAZ   | tyrosine 3-monooxygenase/tryptophan 5-monooxygenase activation protein, zeta polypeptide |
| 80149 | ZC3H12A | zinc finger CCCH-type containing 12A                                                     |
| 7538  | ZFP36   | zinc finger protein 36, C3H type, homolog (mouse)                                        |
